# Supplementary material for: Global extrapolation drastically increases estimated economic costs of biological invasions
Source: Research Square preprint supplement (doi:10.21203/rs.3.rs-5825547/v1), 2025-03-04
Supplement: Supplementary file 1 [file 1f18400f592fe25985b0e28d.docx]

**Global extrapolation drastically increases estimated economic costs of biological invasions**

Gabriel Henrique de Oliveira CaetanoGHOC, Elena AnguloEA, Laís CarneiroLC, Ross N. CuthbertRNC, Thomas EvansTE, Morgane HenryMH, Emma HudginsEH, Elena ManfriniEM, Ismael SotoIS, Julia TouzaJT, Anna J. TurbelinAJT, Ivan JarićIJ, Franck CourchampFC

GHOC, FC, IJ, LCUniversité Paris-Saclay, CNRS, AgroParisTech, Ecologie Systématique et Evolution, 91190, Gif-sur-Yvette, France

EAEstación Biológica de Doñana, CSIC, Avda. Américo Vespucio 26, 41092 Seville, Spain

RNCInstitute for Global Food Security, School of Biological Sciences, Queen's University Belfast, BT9 5DL, Belfast, UK

TEInstitute of Biology, Freie Universität Berlin, Berlin, Germany

MHDepartment of Biology, McGill University, H3A 1B1, Montréal, QC, Canada

EHSchool of Agriculture, Food and Ecosystem Sciences, The University of Melbourne, 3010, Parkville,  Australia

EMUnité Biologie des Organismes et Ecosystèmes Aquatiques (BOREA UMR 8067), Muséum National d'Histoire Naturelle, Sorbonne Universités, Université de Caen Normandie, Université Des Antilles, CNRS, IRD, Paris, France

ISFaculty of Fisheries and Protection of Waters, South Bohemian Research Center of Aquaculture and Biodiversity of Hydrocenoses, University of South Bohemia in České Budějovice, Vodňany, Czech Republic

AJTGreat Lakes Forestry Centre, Natural Resources Canada, Canadian Forest Service, Sault Ste. Marie, Ontario P6A 2E5, Canada

JTDepartment of Environment and Geography and York Environmental Sustainability Institute, University of York, YO10 5NG, York, UK

IJBiology Centre of the Czech Academy of Sciences, Institute of Hydrobiology, České Budějovice, Czech Republic

**Supplemental material**

Supplemental Methods and Results

*Data filtering*

We only selected entries in *InvaCost* that contained values for an entire country (i.e., country-scale costs - entries with the value *Country* in the *Spatial_scale* column of the database). We excluded entries in the database that were estimated (*Potential* costs, column *Implementation* in the database) or those of lower reliability (with methods deemed not transparent or reproducible,  i.e., assigned *Low* in the columns *Method_reliability* and/or *Method_reliability_refined* in the database, see Diagne et al 20201). We also excluded entries for costs that could not be attributed to a single species or impacted sector (as the proportion of costs for each species or sector could not be discerned). The resulting data set had 144 entries with costs attributed to multiple years, so we divided these costs across the number of years attributed to each cost, using the function `expandYearlyCosts` from the R package `invacost`2. This function simply divides the total value by the number of years associated with the cost and assigns the resulting value to each year. We then randomly chose one year out of each multi-year cost entry, to avoid temporal pseudoreplication. Finally, we excluded entries for the 2.5% highest and 2.5% lowest costs of the dataset after applying the filters mentioned above, to avoid any undue influence of outliers on our estimates.

*Model training*

We examined the stabilization of R2 to evaluate if the number of bootstrap replicates was sufficient. This was done by consecutively calculating the median R2 using 2 to 200 replicates, and observing at which number of replicates the variation in R2 is smaller than 0.001 within 10 replicates. The R2 was stable within three decimal points after 170 bootstrap replicates (Figure S5).

We examined the importance of model predictors using the Boruta package3, which creates control variables by duplicating the original predictors and randomly shuffling values between them, and then calculates the mean decrease in accuracy of Random Forest models after sequentially removing the original predictors and the control variables (see more details in Kursa et al. 20104). A predictor is deemed relevant if its importance measure is higher than the maximum importance of the control variables.

 To verify the plausibility of the assumption that species belonging to the same genus affect similar economic sectors, we calculated the average pairwise Jaccard similarity between the economic sectors affected by congeneric species in *InvaCost* and compared it to the same metric calculated using all species in *InvaCost*. The average pairwise Jaccard similarity for species sharing a genus was 0.66 (±0.32), while for all species in the data set the index was 0.37 (±0.38), indicating a higher similarity between species of the same genus.

Persisting biases and knowledge gaps

Undetected invasions can lead to severe underestimation of their impact and hamper management5. While some countries, like Australia, have a more complete characterization of the costs of invasive species established in their territory6, we show that the costs of most species still remain unknown in most countries. This knowledge gap is especially prevalent in Africa and Asia7,8. For example, a recent study conducted a comprehensive literature review and confirmed 551 invasive species in Morocco9, compared to only 14 recorded in GRIIS. Many species are very widespread and cause economic damages in most places they have been introduced, but many of their invasions remain undetected, unreported or are not reported using invasion science terminology10. Such is the case of the black rat, which has been classified by GRIIS as an invasive species only in 60 countries. This species has occurrence records in nearly all countries worldwide based on the Global Biodiversity Information Facility11, but these records do not distinguish if the species is native, invasive, or merely introduced at these locations. Other species, like the pearl wattle (*Leucaena leucocephala*), considered among the 100 of the worst invasive species12, have records in the *InvaCost* database only for costs incurred to manage them, and thus have no records on their direct economic damages. This means that the pearl wattle had to be excluded from our training data, despite being recorded as invasive by GRIIS in 60 countries, since our sources do not detail which economic sectors they or their congenerics affect, if any. Some species do have quantified economic costs available in the scientific literature, but are not yet included in centralized databases such as *InvaCost*, as is the case for many plant species13. Moreover, we could not include management costs in our analysis, which have been increasing in the past few decades and are likely to increase even further in the near future, adding to the total burden of biological invasions worldwide.

A global effort to confirm the invasion status of widespread and costly invasive species in undersampled countries could lead to more complete estimates of the damages invasive species cause to their economy and globally, and this information could then be used to better mitigate these costs, especially in economically vulnerable countries. Our estimates were necessarily limited to species within genera that had reported invasion costs somewhere in their invaded range. Therefore, future approaches should aim to robustly estimate costs for more taxonomically distant species while including different spatial scales, to provide more comprehensive estimates towards the subset of the 37,000 known alien species globally14. Furthermore, at a basic level, confirming if common invasive species that have no recorded economic effects do in fact cause economic damages, and to which economic sectors (including the environment sector, through environmental economic estimation methods15), could lead to a more complete assessment of the global economic costs of invasive species. Large shares of invasion costs are not reported against specific sectors, taxa, or regions, and obtaining these data at higher granularity would improve model fitting through greater data inclusivity. Investment in obtaining this information could also lead to more informed management and prioritisations, alongside considerations of intervention feasibility, which can prevent substantial economic damages in the future16,17.

Although the data used to train our models cover a variety of countries with a range of socioeconomic characteristics, in some exceptional cases, countries may fall outside the range of predictors used to train our models. For example, our cost estimates for three Pacific Island nations (Palau, Marshall Islands, and the Federated States of Micronesia) were higher than their GDP (Figure S6, Supplementary Data 1). These countries are more isolated, have smaller land area, population and GDP than the island nations represented in our training data set (Cuba, Indonesia, Jamaica, Japan, Philippines, Sri Lanka, New Zealand, United Kingdom, with the exception of Grenada, which is in the training data and has a similar profile). While it is likely that smaller economies do experience disproportionate burdens from invasive species, such high values relative to GDP could be due to our model failing to capture economic constraints present in these countries and absent in our training data. Nevertheless, these three countries have a high number of invasive species confirmed to cause economic damages (Palau: 48 species, Marshall Islands: 38 species, Federated States of Micronesia: 57 species), which indicates a very high cost to their economies, despite the limitations in our estimates. In any case, these countries were among the lowest predicted costs (Supplementary Data 1), and are unlikely to have much influence on global or regional patterns.

Supplemental Tables and Figures

**Table S1. Taxonomic breakdown of global economic damage costs of invasive species between 1970 and 2020.** Also denoted are the number of invasions (sum of the number of invasive species in each country) and species considered in the estimation of total costs, and the proportion between the two.

| **Taxonomic group** | **Total cost (± SD, billions USD)** | **Average species cost (± SD, billions USD)** | **Standard deviation of species cost (± SD, billions USD)** | **Number of invasions** | **Number of species** | **Countries/species** |
| --- | --- | --- | --- | --- | --- | --- |
| Fungi/microorganisms | 149.75 (±32.60) | 1.97 (±0.43) | 2.31 (±0.64) | 157 | 76 | 2.07 |
| Invertebrates | 1,257.97 (±234.20) | 4.08 (±0.76) | 8.01 (±1.20) | 1,084 | 308 | 3.52 |
| Plants | 7,098.65 (±1,275.72) | 7.71 (±1.39) | 14.12 (±1.98) | 3,610 | 921 | 3.92 |
| Vertebrates | 1,703.16 (±290.84) | 14.81 (±2.53) | 32.33 (±5.40) | 814 | 115 | 7.08 |

**Table S2. Economic sector breakdown of global economic damage costs of invasive species between 1970 and 2020.** Also denoted are the number of species considered in the estimation as affecting each economic sector, and the number of countries in which at least one species affects each economic sector (from a total number of 1,419 species and 184 countries), and the number of biological invasions that affect each sector (sum of the number of invasive species in each country).

| **Sector** | **Total cost (± SD, billions USD)** | **Number of species** | **Number of countries** | **Number of invasions** |
| --- | --- | --- | --- | --- |
| Agriculture | 4,950.02 (±732.82) | 1,068 | 181 | 4,243 |
| Authorities-stakeholders | 1,362.72 (±252.06) | 267 | 170 | 1,403 |
| Environment | 1,444.87 (±337.88) | 465 | 171 | 1,996 |
| Fishery | 512.28 (±134.23) | 230 | 136 | 1,060 |
| Forestry | 758.87 (±279.34) | 331 | 142 | 1,107 |
| Health | 332.51 (±71.91) | 102 | 165 | 901 |
| Public and social welfare | 884.96 (±218.86) | 449 | 176 | 2,258 |

**Table S3. Continent breakdown of global economic damage costs of invasive species between 1970 and 2020.** Also denoted are the number of species considered in the estimation as affecting each continent, the number of countries affected in each region, and the number of biological invasions (sum of the number of invasive species in each country).

| **Continent** | **Total cost (± SD, billions USD)** | **Number of species** | **Number of countries** | **Number of invasions** |
| --- | --- | --- | --- | --- |
| Africa | 1012.25 (±236.2) | 272 | 49 | 680 |
| Asia | 1,170.94 (±380.64) | 418 | 46 | 943 |
| Europe | 2,282.13 (±345.07) | 552 | 41 | 1,634 |
| North America | 3,266.51 (±1,125.53) | 654 | 23 | 1,015 |
| Oceania | 742.15 (±244.72) | 467 | 14 | 869 |
| South America | 1,570.16 (±269.39) | 289 | 12 | 525 |


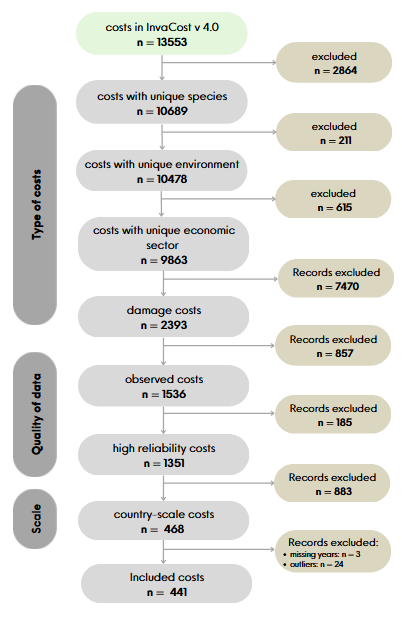


**Figure S1. Data set filtering steps.**


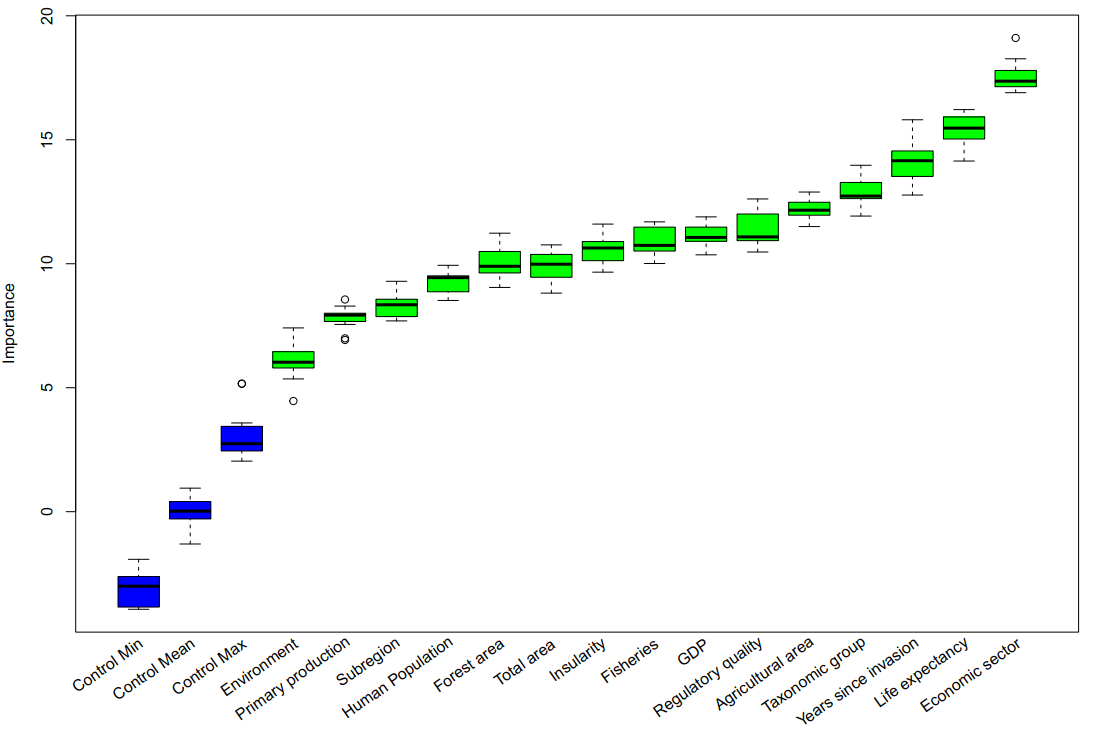


**Figure S2. Predictor importance for estimating the global economic cost of invasive species.** Increase in mean standard error calculated using the Boruta algorithm (Kursa et al. 2010). Blue boxes are control variables, obtained by randomly mixing the values of all predictors.


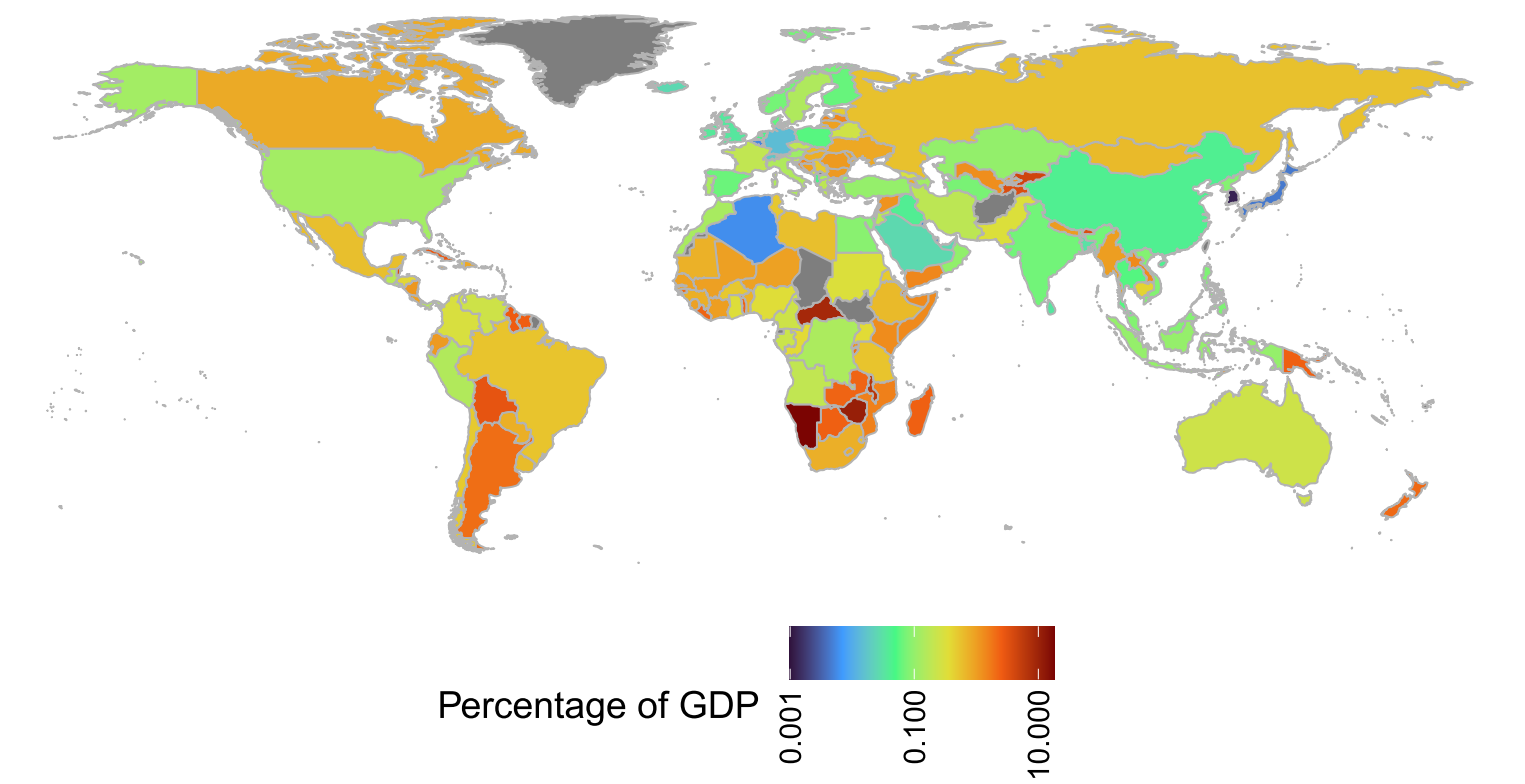


**Figure S3   Global distribution of estimated mean annual economic damage costs of invasive species divided by country Gross Domestic Product.** Countries depicted in gray lacked sufficient data for an estimation.


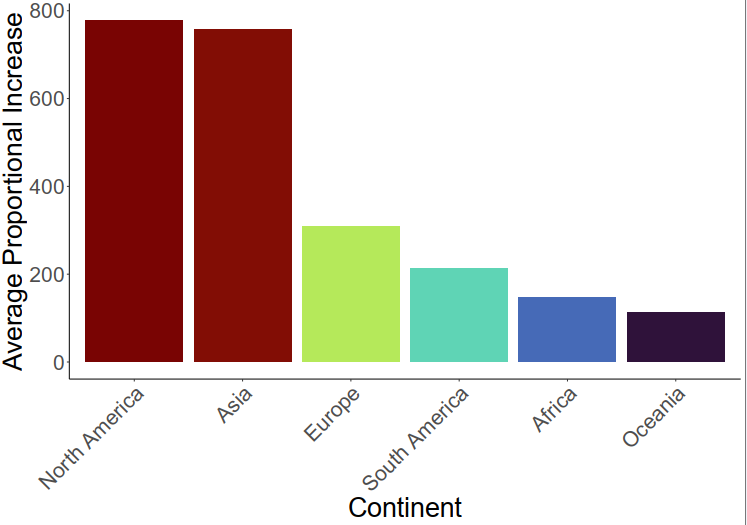


**Figure S4 Average proportional cost augmentation by continent provided by our estimates of invasive species economic costs compared to initial costs used to train our models.**


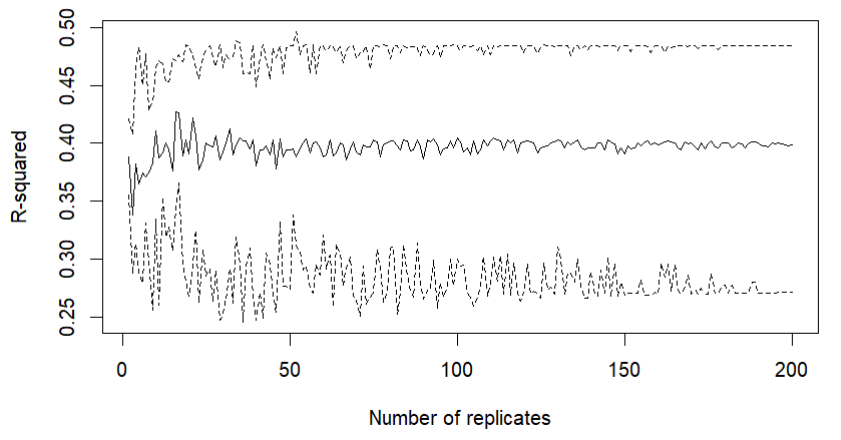


**Figure S5. Median and confidence intervals of Random Forest R-squared, for one to 200 bootstrap replicates.** Dashed lines represent the upper and lower 95% confidence intervals.

**References**

1. Diagne, C. *et al.* InvaCost, a public database of the economic costs of biological invasions worldwide. *Scientific data* **7**, 277 (2020).

2. Leroy, B. *et al.* Analysing economic costs of invasive alien species with the invacost r package. *Methods Ecol Evol* **13**, 1930–1937 (2022).

3. Kursa, M. B., Rudnicki, W. R. & Kursa, M. M. B. Package ‘Boruta’. *The R Journal* **15**, (2018).

4. Kursa, M. B., Jankowski, A. & Rudnicki, W. R. Boruta–a system for feature selection. *Fundamenta Informaticae* **101**, 271–285 (2010).

5. Jarić, I. *et al.* Crypticity in biological invasions. *Trends in ecology & evolution* **34**, 291–302 (2019).

6. Bradshaw, C. J. *et al.* Comprehensive assessment of the economic costs of invasive species in Australia. *NeoBiota. Special Issue “economic costs of invasive alien species worldwide* (2021).

7. Pyšek, P. *et al.* Geographical and taxonomic biases in invasion ecology. *Trends in ecology & evolution* **23**, 237–244 (2008).

8. Bellard, C. & Jeschke, J. M. A spatial mismatch between invader impacts and research publications. *Conservation Biology* **30**, 230–232 (2016).

9. El Jamaai, J. *et al.* Biological invasions and their potential economic costs in Morocco. (2024).

10. Diagne, C. *et al.* Economic costs of invasive rodents worldwide: the tip of the iceberg. *PeerJ* **11**, e14935 (2023).

11. Lane, M. A. & Edwards, J. L. The global biodiversity information facility (GBIF). *Systematics Association special volume* **73**, 1 (2007).

12. Lowe, S., Browne, M., Boudjelas, S. & De Poorter, M. *100 of the World’s Worst Invasive Alien Species: A Selection from the Global Invasive Species Database*. vol. 12 (Invasive Species Specialist Group Auckland, 2000).

13. Novoa, A. *et al.* Global costs of plant invasions must not be underestimated. (2021).

14. Roy, H. E., Pauchard, A. & Stoett, P. Thematic Assessment Report on Invasive Alien Species and their Control of the Intergovernmental Science-Policy Platform on Biodiversity and Ecosystem Services. (2023).

15. Vaissière, A.-C. *et al.* The nature of economic costs of biological invasions. *Biol Invasions* **24**, 2081–2101 (2022).

16. Ahmed, D. A. *et al.* Managing biological invasions: the cost of inaction. *Biol Invasions* **24**, 1927–1946 (2022).

17. Soto, I. *et al.* Monetary impacts should be considered in biological invasion risk assessments. *Journal of Applied Ecology* **60**, 2309–2313 (2023).
